# Supplementary material
Source: publisher figshare collection journal article supplement (https://diabetesjournals.figshare.com/ndownloader/files/34115846)
Supplement: Supplementary file 1 [file 34115846]

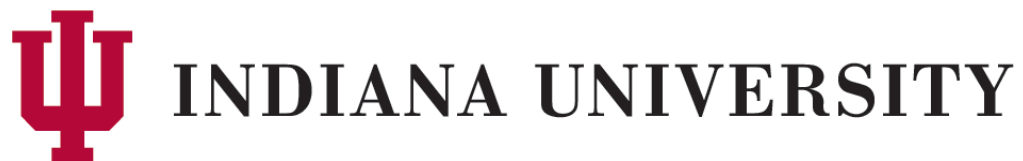

## Demographics

How old are you?

Are you

- ☐ Male
- ☐ Female
- ☐ Prefer not to answer

How old is your child with Type 1 diabetes?

How long has your child had Type 1 diabetes?

What is your highest level of education?

- ☐ No schooling completed
- ☐ High school or less
- ☐ Vocational training
- ☐ Some college
- ☐ Associate's degree
- ☐ Bachelor's degree
- ☐ Graduate or professional

☐  Other

Indicate the range of your total annual family income:

- ☐ Less than \$20,000
- ☐ \$20,000 - \$50,000
- ☐ \$50,000 - \$75,000
- ☐ \$75,000 - \$99,000
- ☐ More than \$99,000
- ☐  Other

What type of insurance does your child have?

- ☐ Medicare
- ☐ Medicaid
- ☐ Private Insurance (from an employer)
- ☐ Tri-Care

- ☐ No Insurance/Self-Pay
- ☐  Other
- ☐ I don't know

## COVID-19 Questions

Have you or anyone you know been diagnosed with COVID-19?

- ☐ Yes
- ☐ No

Have you spent any time seeking COVID-19 related health information online for someone else?

- ☐ Yes
- ☐ No

Have you lost your job due to COVID-19?

- ☐ Yes
- ☐ No

Have you experienced financial difficulty related to COVID-19?

- ☐ Yes
- ☐ No

Have you received any COVID-19 related health information that you did not try to find? (For example, by email, on social media, on TV, radio, other)?

- ☐ Yes
- ☐ No

For the following questions, please select the number that best corresponds to your views.

|                                          | 1 - Not at all        | 2 - A little          | 3 - Somewhat          | 4 - Quite a bit       | 5 - Very much         |
|------------------------------------------|-----------------------|-----------------------|-----------------------|-----------------------|-----------------------|
| How much does COVID-19 affect your life? | <input type="radio"/> |
| Does COVID-19 make you feel angry?       | <input type="radio"/> |
| Does COVID-19 make you feel scared?      | <input type="radio"/> |
| Does COVID-19 make you feel upset?       | <input type="radio"/> |
| Does COVID-19 make you feel depressed?   | <input type="radio"/> |
| Does COVID-19 make you feel anxious?     | <input type="radio"/> |

|                                                                                                                                          | 1 – Much<br>less than<br>before | 2 – Less<br>than before | 3 – The<br>same       | 4 – More<br>than before | 5 – Much<br>more than<br>before |
|------------------------------------------------------------------------------------------------------------------------------------------|---------------------------------|-------------------------|-----------------------|-------------------------|---------------------------------|
| How would you<br>compare your stress<br>level during the<br>COVID-19 pandemic<br>to your stress level<br>before the pandemic<br>started? | <input type="radio"/>           | <input type="radio"/>   | <input type="radio"/> | <input type="radio"/>   | <input type="radio"/>           |

## General Self – Efficacy

For the next set of questions, please read each sentence and rate your level of confidence in managing various situations, problems, and events.

|                                                                              | 1 - I am not<br>at all<br>confident | 2 - I am a<br>little<br>confident | 3 - I am<br>somewhat<br>confident | 4 - I am<br>quite<br>confident | 5 - I am<br>very<br>confident |
|------------------------------------------------------------------------------|-------------------------------------|-----------------------------------|-----------------------------------|--------------------------------|-------------------------------|
| I can manage to<br>solve difficult<br>problems if I try hard<br>enough       | <input type="radio"/>               | <input type="radio"/>             | <input type="radio"/>             | <input type="radio"/>          | <input type="radio"/>         |
| I am confident that I<br>could deal efficiently<br>with unexpected<br>events | <input type="radio"/>               | <input type="radio"/>             | <input type="radio"/>             | <input type="radio"/>          | <input type="radio"/>         |
| If I am in trouble, I can<br>think of a solution                             | <input type="radio"/>               | <input type="radio"/>             | <input type="radio"/>             | <input type="radio"/>          | <input type="radio"/>         |
| I can handle whatever<br>comes my way                                        | <input type="radio"/>               | <input type="radio"/>             | <input type="radio"/>             | <input type="radio"/>          | <input type="radio"/>         |

## **Self-Efficacy for Managing Children with Type 1 Diabetes During COVID-19**



We would like to know how confident you are in doing certain activities during the COVID-19 pandemic. For each of the following questions, please choose the number that corresponds to your confidence that you can do the tasks regularly at the present time.

|                                                                                                        | 1 - Not at all        | 2 - A little          | 3 - Somewhat          | 4 - Quite a bit       | 5 - Very much         |
|--------------------------------------------------------------------------------------------------------|-----------------------|-----------------------|-----------------------|-----------------------|-----------------------|
| How confident are you that you can take care of your child with the added burden of social distancing? | <input type="radio"/> |
| How much does emotional distress interfere with taking care of your child with diabetes?               | <input type="radio"/> |

|                                                                                                             | 1 - Not at all        | 2 - A little          | 3 - Somewhat          | 4 - Quite a bit       | 5 - Very much         |
|-------------------------------------------------------------------------------------------------------------|-----------------------|-----------------------|-----------------------|-----------------------|-----------------------|
| How much does emotional distress caused by COVID-19 interfere with the management of your child's diabetes? | <input type="radio"/> |
| How confident do you feel that you can manage your child's diabetes at home?                                | <input type="radio"/> |

## Perceived Self-Efficacy Scale

We would like to know how confident you are in doing certain activities during the COVID-19 pandemic. For each of the following questions, please choose the number that corresponds to your confidence that you can do the tasks regularly at the present time.

|                                                                                                              | 1 - Not at all        | 2 - A little          | 3 - Somewhat          | 4 - Quite a bit       | 5 - Very much         |
|--------------------------------------------------------------------------------------------------------------|-----------------------|-----------------------|-----------------------|-----------------------|-----------------------|
| How confident are you in your ability to make COVID-19 prevention choices?                                   | <input type="radio"/> |
| How confident are you in your ability to use your knowledge of COVID-19 in making travel choices?            | <input type="radio"/> |
| How confident are you in your ability to use your knowledge of COVID-19 in making everyday activity choices? | <input type="radio"/> |

## Perceived Threat Scale

For the following questions, please select the number that

best corresponds to your views.

|                                                                                              | 1 - Not at all        | 2 - A little          | 3 - Somewhat          | 4 - Quite a bit       | 5 - Very much         |
|----------------------------------------------------------------------------------------------|-----------------------|-----------------------|-----------------------|-----------------------|-----------------------|
| If your child was to develop flu like symptoms, would you be afraid your child has COVID-19? | <input type="radio"/> |
| As a threat to world health, how severe do you think COVID-19 is?                            | <input type="radio"/> |
| Do you think your child is at increased risk of getting COVID-19?                            | <input type="radio"/> |
| If your child were to get COVID-19, how sick would your child get?                           | <input type="radio"/> |

|                                                     | 1 - Not at all        | 2 - A little          | 3 - Somewhat          | 4 - Quite a bit       | 5 - Very much         |
|-----------------------------------------------------|-----------------------|-----------------------|-----------------------|-----------------------|-----------------------|
| I believe my child is at risk for getting COVID-19. | <input type="radio"/> |
| I believe we are all at risk for getting COVID-19   | <input type="radio"/> |

## Information Receptivity Scale

For the following questions, please select the number that best corresponds to your views.

|                                                                                                    | 1 - Not at all        | 2 - A little          | 3 - Somewhat          | 4 - Quite a bit       | 5 - Very much         |
|----------------------------------------------------------------------------------------------------|-----------------------|-----------------------|-----------------------|-----------------------|-----------------------|
| I actively search for information about the COVID-19 and type 1 diabetes.                          | <input type="radio"/> |
| I intend to search actively most every day for information about the COVID-19 and type 1 diabetes. | <input type="radio"/> |
| I communicate a lot with other parents of children with type 1 diabetes about the COVID-19.        | <input type="radio"/> |

## Prevention Behavior Scale

For the following questions, please select the number that best corresponds to your views.

|                                                                               | 1 - Not at all        | 2 - A little          | 3 - Somewhat          | 4 - Quite a bit       | 5 - Very much         |
|-------------------------------------------------------------------------------|-----------------------|-----------------------|-----------------------|-----------------------|-----------------------|
| It is important to me to do everything to avoid my child getting COVID-19.    | <input type="radio"/> |
| I actively seek information on how to prevent my child from getting COVID-19. | <input type="radio"/> |
| I am doing all that I can to prevent my child from getting COVID-19.          | <input type="radio"/> |
| I have changed my child's routine to try to avoid getting COVID-19.           | <input type="radio"/> |

## Qualitative Questions

Please share your sources for information about COVID-19 and Type 1 Diabetes:



Do you feel these sources are reliable (yes/no)? Please provide an explanation below:



What are your worries about COVID-19 and Type 1 Diabetes?



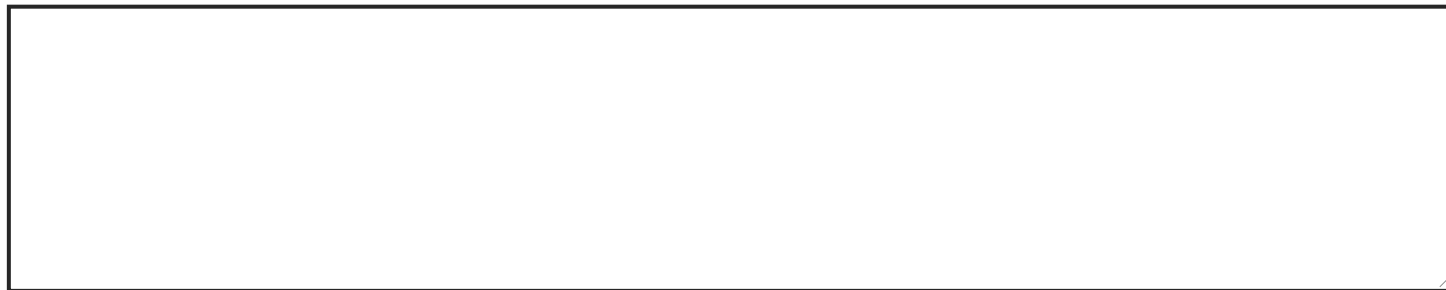

Do you have someone to talk to about Type 1 diabetes and COVID-19? Who are they and how often do you talk with them?



What has been the most challenging part of the COVID-19 and your child's Type 1 diabetes?



How do you deal with the stress created by the COVID-19 pandemic?



Powered by Qualtrics
